# Supplementary material for: Synergistic Inhibitory Effect of Ionizing Radiation Combined With Imatinib on Gastrointestinal Stromal Tumor Cell and Its Mechanism
Source: Research Square preprint supplement (doi:10.21203/rs.3.rs-103663/v1), 2020-11-12
Supplement: Supplementary file 1 [file 385f7bebbec8b5bcf436a6c4.docx]

**Results of GIST-882 cell mutation detection**

**Exon9（no differences）**

Sequencing analysis：AGGGAACTTCGTCCTTTAGATGCTCTGCTTCTGTACTGCCAGTGGATGTGCAGACACTAAACTCATCTGGGCCACCGTTTGGAAAGCTAGTGGTTCAGAGTTCTATAGATTCTAGTGCATTCAAGCACAATGGCACGGTTGAATGTAAGGCTTACAACGATGTGGGCAAGACTTCTGCCTATTTTAACTTTGCATTTAAAGGTAACAACAAAGGTATATTTCTTTTTAATCCAATTTAAGGGGATGTTTAGGCTCTGTCTACCATATCAGTCATGAT

The original sequence：

ATGCTCTGCTTCTGTACTGCCAGTGGATGTGCAGACACTAAACTCATCTGGGCCACCGTTTGGAAAGCTAGTGGTTCAGAGTTCTATAGATTCTAGTGCATTCAAGCACAATGGCACGGTTGAATGTAAGGCTTACAACGATGTGGGCAAGACTTCTGCCTATTTTAACTTTGCATTTAAAGGTAACAACAAAG

**Exon11（no differences）**

Sequencing analysis：

AAAAATTAAAGTGAGCTATTTTTCACTTTCTCCCCACAGAAACCCATGTATGAAGTACAGTGGAAGGTTGTTGAGGAGATAAATGGAAACAATTATGTTTACATAGACCCAACACAACTTCCTTATGATCACAAATGGGAGTTTCCCAGAAACAGGCTGAGTTTTGGTCAGTATGAAACAGGGGCTTTCCATGTCACCTTTTTGGGTA

The original sequence：

AAACCCATGTATGAAGTACAGTGGAAGGTTGTTGAGGAGATAAATGGAAACAATTATGTTTACATAGACCCAACACAACTTCCTTATGATCACAAATGGGAGTTTCCCAGAAACAGGCTGAGTTTTG

**Exon13**

Sequencing analysis：

CCGATATCTCGGGAGGGCAACACTGCAGAGACGATGAAGAGACCCTCTGTCTGA{}CTCGAAGTCCTGAGTTACCTTGGTAATCACATGAATATTGTGAATCTACTTGGAGCCTGCACCATTGGAGGTAAAGCCGTGTCCAAGCTGCCTTTTATTGTCTGTCAGGTTATCAAAACATGACATTTTAATATGATTTTGGCAATGCTAGATTATAAAATC

The original sequence：

CGAGTGCCCATTTGACAGAACGGGAAGCCCTCATGTCTGAACTCAAAGTCCTGAGTTACCTTGGTAATCACATGAATATTGTGAATCTACTTGGAGCCTGCACCATTGGAG

**Exon14**

Sequencing analysis：

---------------------AGAATTGCTTGCATGGTGATCTTTTGA-TTTTTTGAGAAGAAAACGTGATTCATTTATTTGTTCAAAGCAGGAAGATCATGCAGAAGCTGCACTTTATAAGAATCTTCTGCATTCAAAGGAGTCTTCCTGGTAAGACTGATTTACATAAATAGTTAGCTGTTGACAGGCAGTTCATGGGGTCATAAGGGTTTGCAATCAA

The original sequence：

GGCCCACCCTGGTCATTACAGAATATTGTTGCTATGGTGATCTTTTGAATTTTTTGAGAAGAAAACGTGATTCATTTATTTGTTCAAAGCAGGAAGATCATGCAGAAGCTGCACTTTATAAGAATCTTCTGCATTCAAAGGAGTCTTCCTG

**Exon17**

Sequencing analysis：

--------------------------------GGGCATCGTCGT-ACT-ATGGTCGGATCACAAAGATTTGTGATTTTGGTCTAGCCAGAGACATCAAGAATGATTCTAATTATGTGGTTAAAGGAAACGTGAGTACCCATTCTCTGCTTGACAGTCCTGCAAAGGATTTTTAGTTTCAACTTTCGATAAAAATTGTTTCCTGTGACTTTCTAATGTAAATCCC

The original sequence：

TGTATTCACAGAGACTTGGCAGCCAGAAATATCCTCCTTACTCATGGTCGGATCACAAAGATTTGTGATTTTGGTCTAGCCAGAGACATCAAGAATGATTCTAATTATGTGGTTAAAGGAAAC

**Exon18**

Sequencing analysis：

ACAAATCATCTGTTCATTTTGTTGAGCTTCTGAATTAACATTATTGACTCTGTTGTGCTTCTATTACAGGCTCGACTACCTGTGAAGTGGATGGCACCTGAAAGCATTTTCAACTGTGTATACACGTTTGAAAGTGACGTCTGGTCCTATGGGATTTTTCTTTGGGAGCTCTTCTCTTTAGGTAAAATGATCCTTGCCAAAGACAACTTCAA

The original sequence：
---------------------------------------------------------------------GCTCGACTACCTGTGAAGTGGATGGCACCTGAAAGCATTTTCAACTGTGTATACACGTTTGAAAGTGACGTCTGGTCCTATGGGATTTTTCTTTGGGAGCTGTTCTCTTTAG

**PDGFRA Exon12**

Sequencing analysis：

GATGGGCCCGCGGGGATTTGGTATTCACCAGTTACCTGTCCTGGTCATTTATAGAAACCGAGGTATGAAATTCGCTGGAGGGTCATTGAATCAATCAGCCCGGATGGACATGAATATATTTATGTGGACCCGATGCAGCTGCCTTATGACTCAAGATGGGAGTTTCCAAGAGATGGACTAGTGCTTGGTAAGTTCCATGGGGTAACCTCCCAAGACTCCCTTTTCCCTTGCACTT

The original sequence：

------------------------------------------------------AAACCGAGGTATGAAATTCGCTGGAGGGTCATTGAATCAATCAGCCCAGATGGACATGAATATATTTATGTGGACCCGATGCAGCTGCCTTATGACTCAAGATGGGAGTTTCCAAGAGATGGACTAGTGCTTG

**PDGFRA**  **Exon18**

Sequencing analysis：

CAATTAATACATTTATCTCAGATGATGTTGATCATGAGTCATTTCTTTCTTTTCCATGCGGTGAGTCCACCGTGATCTGGCTGCTCGCAACGTTCTCCTGGCACAAGGAAAAATTGTGAAGATCTGTGACTTTGGCCAGGCCAGAGACATCATGCATGATTCGAACTATGTGTCGAAAGGCATTGTACGTCCTCACTTCCCTCACTGGTCAGGCTCATCCTCCTTCACAC

The original sequence：

-------------------------------------------------------------TGTGTCCACCGTGATCTGGCTGCTCGCAACGTCCTCCTGGCACAAGGAAAAATTGTGAAGATCTGTGACTTTGGCCTGGCCAGAGACATCATGCATGATTCGAACTATGTGTCGAAAGGCAGTGTA

Exon 9 and exon 11 of C-kit gene have no mutation，but exon 18 has an unintentional mutation，exon13 and exon 17 have more mutations，PDGFRA exon12 has an unintentional mutation，exon 18 has a point mutation in the first part of the sequence that causes the translation to stop.
